# Supplementary material for: Male Disadvantage in Oxidative Stress-Associated Complications of Prematurity: A Systematic Review, Meta-Analysis and Meta-Regression
Source: MDPI journal article supplement (doi:10.3390/antiox10091490), 2021-09-18
Supplement: s1 [file s1]

## Supplementary Material

### Male Disadvantage in Oxidative Stress-Associated Complications of Prematurity: A Systematic Review, Meta-analysis and Meta-regression

Elke van Westering-Kroon, Maurice J Huizing, Eduardo Villamor-Martínez and Eduardo Villamor

**Supplementary Table 1. Search strategy**

**Pubmed**

(Sex[MESH] OR Sex Characteristics[MESH] OR Sex Distribution[MESH] OR "Sex Characteristic\*" [tiab] OR "Gender Difference\*" [tiab] OR "Sex Dimorphism\*" [tiab] OR "Gender Characteristic\*" [tiab] OR "Sex Difference\*" [tiab] OR "Sex Distribution\*" [tiab] OR "Gender Distribution\*" [tiab] OR "Male Disadvantage" [tiab] OR "Female Advantage" [tiab])  
AND  
(  
(Premature Infant[MESH] OR Extremely Premature Infant[MESH] OR Premature Birth[MESH] OR Low Birth Weight Infant[MESH] OR Very Low Birth Weight Infant[MESH] OR "Premature Infant\*" [tiab] OR "Preterm Infant\*" [tiab] OR "Preterm Infant" [tiab] OR "Premature Infants" [tiab] OR "Neonatal Prematurity" [tiab] OR "Low-Birth-Weight Infant\*" [tiab] OR "Infants, Low-Birth-Weight" [tiab] OR "Low Birth Weight Infant" [tiab] OR "Low-Birth-Weight Infants" [tiab] OR "Low Birth Weight\*" [tiab] )  
OR  
(Retinopathy of Prematurity[mesh] OR Prematurity Retinopathies[tiab] OR Prematurity Retinopathy[tiab] OR Retrolental Fibroplasia[tiab] OR Retrolental Fibroplasia\* [tiab])  
OR  
(Necrotizing enterocolitis[mesh] OR Necrotizing enterocolitis[tiab])  
OR  
(Periventricular Leukomalacia [mesh] OR Leukomalacia\* [tiab] OR Periventricular Encephalomalacia\* [tiab] OR Periventricular Leukomalacia\* [tiab] OR Neonatal Cerebral Leukomalacia\* [tiab] OR Cystic Periventricular Leukomalacia\* [tiab])  
OR  
(Bronchopulmonary Dysplasia [mesh] OR Bronchopulmonary Dysplasia[tiab] OR "Chronic Lung Disease" [tiab])  
OR  
(Cerebral Intraventricular Hemorrhage [mesh] OR Intraventricular Hemorrhage[tiab] OR Intraventricular Haemorrhage[tiab] OR Intracranial Hemorrhage[tiab] OR Intracranial Haemorrhage[tiab])  
)

**Embase**

(  
(exp Sex Characteristics/ OR exp Sex Distribution / OR exp Sex Factors/)  
OR ("male disadvantage" or "female advantage" or gender or sex or "gender difference" or "gender differences" or "sex difference" or "sex differences" or "gender differential" or "gender differentials" or "sex differential" or "sex differentials" or "sexual dimorphism" or "sexually dimorphic")  
)  
AND  
(  
(exp Premature infant/ OR exp Premature Birth OR exp Low Birth Weight Infant/ OR Extremely Low Birth Weight Infant/)  
OR  
(bronchopulmonary dysplasia/ OR enterocolitis, necrotizing/ OR Cerebral Intraventricular Hemorrhage/ OR "Intraventricular Hemorrhage" OR Leukomalacia, Periventricular/ OR "Retinopathy of Prematurity"/)  
)

**Supplementary Table 2. Characteristics of the included studies**

| First author             | Year | Country   | Total n | Male to female ratio | Gestational age (weeks) | Median year cohort | Prospective? | Singleton/Twins | Obstetric and perinatal variables                                                                 | Postnatal variables and outcomes                                                                    | NOS Selection | NOS Comparability | NOS Outcome | NOS Total |
|--------------------------|------|-----------|---------|----------------------|-------------------------|--------------------|--------------|-----------------|---------------------------------------------------------------------------------------------------|-----------------------------------------------------------------------------------------------------|---------------|-------------------|-------------|-----------|
| Bertino <sup>1</sup>     | 2009 | Italy     | 262     | 0,87                 | 30.4                    | 1997               | No           | Both            | BW, GA, SGA (P10)                                                                                 | BPD36, LOS, PDA                                                                                     | 4             | 2                 | 3           | 9         |
| Binet <sup>2</sup>       | 2012 | Canada    | 2744    | 1,17                 | 25.7                    | 2003               | No           | Both            | ACS, Outborn                                                                                      | BPD36, IVH 3-4, Mortality, NEC>1, sROP                                                              | 4             | 1                 | 3           | 8         |
| Boghossian <sup>3</sup>  | 2018 | USA       | 205731  | 1,12                 | 26.0                    | 2011               | No           | Both            | BW, ACS, Chorio, HDP, Intubation birth, Prenatal care                                             | BPD36, EOS, IVH 3-4, LOS, Mortality, NEC>1/LIP, PDA, Pneumothorax, Postnatal steroids, RDS, Surfact | 4             | 1                 | 3           | 8         |
| Chen <sup>4</sup>        | 2018 | China     | 370     | 1,96                 | 33.1                    | 2011               | No           | Both            | Abruption, ACS, BW, C-section, Fetal distress, GA, HDP, Mat diabetes, PremROM                     | Mortality, Mec Ventil, RDS, Surfact                                                                 | 4             | 2                 | 3           | 9         |
| Derzbach <sup>5</sup>    | 2005 | Hungary   | 140     | 0,94                 | 29.0                    | 2003               | No           | Both            | BW, GA                                                                                            | IVH 1-4, Hypotension, NEC, PDA, RDS, UOS                                                            | 3             | 2                 | 3           | 8         |
| Deulofeut <sup>6</sup>   | 2007 | USA       | 497     | 0,94                 | 27.0                    | 2001               | No           | Both            | ACS, BW, C-section, GA, Prenatal care, SGA(P10)                                                   | IVH 1-4, BPD36, IVH 3-4, Mortality, PVL, ROP (all), sROP                                            | 4             | 2                 | 3           | 9         |
| Elsmen <sup>7</sup>      | 2004 | Sweden    | 236     | 1,23                 | 26.4                    | 1997               | No           | Both            | ACS, BW, C-section,GA, HDP, Intubation birth, SGA(P10), Spont pregnancy                           | BPD36, Hypotension, PDA, Surfact                                                                    | 4             | 1                 | 3           | 8         |
| Gagliardi <sup>8</sup>   | 2021 | Network   | 20924   | 1,13                 | 26.9                    | 2011               | No           | Twins           | BW, ACS, C-section, GA, Outborn, SGA (P10)                                                        | BPD36, IVH 3-4/PVL, sROP                                                                            | 3             | 2                 | 3           | 8         |
| Garfinkle <sup>9</sup>   | 2018 | Canada    | 59523   | 0,94                 | 26.0                    | 2012               | No           | Both            | Apgar5<7, C-section, GA, HDP, Mat age, Mat diabetes, Outborn, SGA(P10)                            | BPD36, IVH 3-4/PVL, LOS, Mortality, NEC>1, sROP                                                     | 4             | 2                 | 3           | 9         |
| Griesmaier <sup>10</sup> | 2014 | Austria   | 156     | 1,20                 | 30.5                    | 2010               | No           | Both            | ACS, BW, GA, SGA(P10)                                                                             | BPD28, EOS, LOS, NEC, PDA, PremROM,                                                                 | 4             | 1                 | 3           | 8         |
| Harris <sup>11</sup>     | 2019 | UK        | 319     | 1,03                 | 26.9                    | 1999               | No           | Both            | ACS, BW, GA, Mat age, Smoking                                                                     | BPD28, BPD36, NEC (all), PDA, Pneumothorax, Postnatal steroids, Pulm Hem                            | 3             | 1                 | 3           | 7         |
| Hintz <sup>12</sup>      | 2006 | USA       | 2553    | 0,91                 | 25.4                    | 1999               | Yes          | Both            | ACS, BW, Apgar5<5, C-section, GA, Intubation birth, Mat age, Outborn, ProlROM, Resuscit, SGA(P10) | BPD36, EOS, IVH3-4, LOS, NEC>1, PDA, Postnatal steroids, PVL, sROP, Surfact                         | 4             | 2                 | 3           | 9         |
| Huang <sup>13</sup>      | 2012 | Taiwan    | 195     | 1,50                 | 28.4                    | 2002               | No           | Both            |                                                                                                   | PVL, sROP                                                                                           | 4             | 1                 | 3           | 8         |
| Ito <sup>14</sup>        | 2017 | Japan     | 38023   | 1,04                 | 28.0                    | 2008               | No           | Both            | ACS, BW, Chorio, Gest diabetes, HDP, Mat age, PremROM                                             | BPD28, BPD36, LIP, IVH 1-4, Mortality, NEC, PDA, PVL, RDS, sROP                                     | 4             | 1                 | 3           | 8         |
| Jennische <sup>15</sup>  | 2003 | Sweden    | 64      | 1,29                 | 28.9                    | 1988               | No           | Both            | BW, GA, SGA(P10), Resuscit                                                                        | BPD28, PDA, Pneumothorax, RDS, UOS                                                                  | 4             | 2                 | 3           | 9         |
| Jones <sup>16</sup>      | 2007 | Canada    | 3117    | 1,27                 | 27.4                    | 1997               | Yes          | Both            | ACS, ,Outborn, SGA(P10)                                                                           | BPD36, EOS, IVH 3-4, LOS, M vent, Mortality, NEC>1, PDA, sROP                                       | 4             | 2                 | 3           | 9         |
| Kent <sup>17</sup>       | 2012 | Australia | 2549    | 1,21                 | 26.3                    | 2001               | No           | Both            | ACS, Apgar5<7, C-section, Fetal Distress, HDP, Intrapartum hemo, IUGR, Outborn, ProlROM, SGA(P10) | BPD36, IVH 3-4, Mortality, NEC (all), PDA, Pneumothorax, Postnatal steroids, sROP, Surfact          | 4             | 2                 | 3           | 9         |
| Lauterbach <sup>18</sup> | 2001 | USA       | 51      | 0,70                 | 32.3                    | 1990               | No           | Both            | BW, C-section, GA, Gest diabetes, HDP, Mat age                                                    | BPD28, Hypotension, PDA, Pneumothorax, Postnatal steroids, UOS, Surfact                             | 3             | 1                 | 3           | 7         |
| Lavoie <sup>19</sup>     | 1989 | Canada    | 22      | 0,83                 | 27.0                    | 1988               | No           | Both            | BW, C-section, GA                                                                                 | BPD28, BPD36, IVH 1-4, Mec Ventil, Surfact                                                          | 3             | 1                 | 3           | 7         |
| Mansson <sup>20</sup>    | 2015 | Sweden    | 398     | 1,20                 | 31.4                    | 2006               | No           | Both            | Mat age, SGA (-2SD)                                                                               | BPD36, IVH3-4/PVL, NEC (all), sROP                                                                  | 4             | 2                 | 3           | 9         |

| First author                | Year | Country     | Total n | Male to female ratio | Gestational age (weeks) | Median year cohort | Prospective? | Singleton/Twins | Obstetric and perinatal variables                                                                                                                                 | Postnatal variables and outcomes                                                                                   | NOS Selection | NOS Comparability | NOS Outcome | NOS Total |
|-----------------------------|------|-------------|---------|----------------------|-------------------------|--------------------|--------------|-----------------|-------------------------------------------------------------------------------------------------------------------------------------------------------------------|--------------------------------------------------------------------------------------------------------------------|---------------|-------------------|-------------|-----------|
| Melamed <sup>21</sup>       | 2009 | Israel      | 5408    | 0,97                 | 35.0                    | 2001               | No           | Twins           | BW, C-section, GA, HDP, Mat age, BW, GA, Mat diabetes, Mother>35, SGA(P10)                                                                                        | IVH 1-4, NEC (all), RDS                                                                                            | 3             | 2                 | 3           | 8         |
| Mohamed <sup>22</sup>       | 2010 | USA         | 104847  | 1,03                 | VLBW                    | 2000               | No           | Both            | HDP, PDA,                                                                                                                                                         | IVH 1-4, IVH 3-4, Mortality, NEC (all), Pulm hem, PVL, RDS                                                         | 4             | 2                 | 3           | 9         |
| Neubauer <sup>23</sup>      | 2012 | Austria     | 408     | 1,18                 | 31.0                    | 2006               | No           | Both            | ACS, Apgar1<3, Apgar5<3, C-section, ProlROM, Outborn, SGA(P10), Smoking                                                                                           | BPD36, EOS, LOS, NEC>1, PDA, sROP, Surfact                                                                         | 4             | 1                 | 3           | 8         |
| Peacock <sup>24</sup>       | 2012 | UK          | 797     | 1,16                 | 26.5                    | 2000               | No           | Both            |                                                                                                                                                                   | IVH 3-4, sROP,                                                                                                     | 3             | 1                 | 3           | 7         |
| Ramos Navarro <sup>25</sup> | 2020 | Spain       | 389     | 1,48                 | 28.5                    | 2015               | Yes          | Both            | Intubation birth                                                                                                                                                  | BPD36, Mec vent, Mortality, Pneumothorax, Surfact                                                                  | 4             | 1                 | 3           | 8         |
| Shim <sup>26</sup>          | 2017 | Korea       | 2163    | 1,07                 | 27.2                    | 2014               | No           | Both            | ACS, BW, Chorio, C-section, GA, HDP, Mat diabetes, Outborn, SGA(P10)                                                                                              | BPD36, IVH 3-4, Mortality, NEC>1, PVL, sROP                                                                        | 4             | 1                 | 3           | 8         |
| Shinwell <sup>27</sup>      | 2007 | Israel      | 8858    | 1,08                 | 28.6                    | 1999               | No           | Both            | ACS, BW, Chorio, C-section, GA, Infertility therapy, Intrapartum hemo, PremROM, prenatal care, Preterm Labor                                                      | BPD36, IVH 3-4, Mortality, Pneumothorax, PVL, RDS, sROP                                                            | 4             | 2                 | 3           | 9         |
| Skiold <sup>28</sup>        | 2014 | Sweden      | 107     | 1,28                 | 25.5                    | 2006               | No           | Both            |                                                                                                                                                                   | IVH 1-4, IVH 3-4,sROP                                                                                              | 4             | 1                 | 3           | 8         |
| Spinillo <sup>29</sup>      | 2009 | Italy       | 754     | 1,09                 | 30.3                    | 1997               | No           | Both            | Abruption, ACS, BW, Chorio, C-section, Fetal distress, GA, HDP, Mat age, Placenta previa, PremROM, SGA(P10), Smoking                                              | IVH 1-4, IVH 3-4, PVL                                                                                              | 4             | 2                 | 3           | 9         |
| Stark <sup>30</sup>         | 2009 | Australia   | 43      | 1.15                 | 29                      | 2007               | Yes          | Single          | ACS, Chorio, C-section, HDP, SGA(P10)                                                                                                                             |                                                                                                                    | 4             | 1                 | 3           | 8         |
| Stark <sup>31</sup>         | 2011 | Australia   | 60      | 1,07                 | 29                      | 2009               | Yes          | Both            | SGA (P10)                                                                                                                                                         | IVH 3-4, Mortality, PDA                                                                                            | 4             | 1                 | 3           | 8         |
| Steen <sup>32</sup>         | 2013 | Sweden      | 2419    | 1,18                 | 30                      | 2002               | No           | Twins           | HDP,                                                                                                                                                              | BPD36, IVH 3-4, Pneumothorax, RDS, UOS                                                                             | 3             | 1                 | 3           | 7         |
| Stevenson <sup>33</sup>     | 2000 | USA         | 6738    | 0,99                 | 28.5                    | 1992               | No           | Both            | ACS, Adol mother, Ant AB, Intrapartum hemo, Apgar1<3, Apgar5<3, C-section, Intubation birth, Mother Married, Mother>35, PremROM, prenatal care, ProlROM, Resuscit | IVH 1-4, BPD28,BPD36, Mec Ventil, Meningitis, Mortality, NEC>1, PDA, PVL, RDS, UOS, IVH 3-4, Surfact, Urine Infect | 4             | 1                 | 3           | 8         |
| Stimac <sup>34</sup>        | 2019 | Croatia     | 159     | 1,12                 | 30                      | 2013               | No           | Both            | C-section, HDP, Mat diabetes                                                                                                                                      | IVH 1-4, RDS                                                                                                       | 4             | 0                 | 3           | 7         |
| Tioseco <sup>35</sup>       | 2006 | USA         | 874     | 1,00                 | 30.9                    | 1998               | No           | Both            |                                                                                                                                                                   | BPD36, IVH 1-4, IVH 3-4, Mortality, NEC (all), PDA, PVL, ROP (all), UOS                                            | 4             | 2                 | 3           | 9         |
| Tottman <sup>36</sup>       | 2020 | New Zealand | 478     | 1,22                 | 28                      | 2007               | Yes          | Both            | ACS , Outborn, ProlROM,                                                                                                                                           | BPD36, Mortality, IVH 3-4, NEC>1, UOS, sROP                                                                        | 4             | 1                 | 3           | 8         |
| Walker <sup>37</sup>        | 2012 | Canada      | 262     | 1,15                 | 28.6                    | 2005               | No           | Single          | C-section, HDP, SGA(P10), SGA(P3)                                                                                                                                 |                                                                                                                    | 4             | 1                 | 3           | 8         |
| Wang <sup>38</sup>          | 2018 | Taiwan      | 3507    | NA                   | <32                     | 2011               | No           | Both            |                                                                                                                                                                   | BPD36, PVL, sROP                                                                                                   | 4             | 1                 | 3           | 8         |
| Zhao <sup>39</sup>          | 2017 | USA         | 114960  | 1,00                 | <37                     | 2000               | No           | Twins           | Apgar5<7                                                                                                                                                          | Mortality, Mec Ventil, RDS                                                                                         | 3             | 2                 | 3           | 8         |
| Zisk <sup>40</sup>          | 2011 | USA         | 12807   | 1,10                 | 29.4                    | 2005               | No           | Both            | Apgar5<3, SGA(p10)                                                                                                                                                | BPD36, IVH 3-4, Mortality, NEC (all), PDA Pneumothorax, Postnatal steroids, sROP, Surfact, UOS                     | 4             | 2                 | 3           | 9         |

| First author         | Year | Country | Total n | Male to female ratio | Gestational age (weeks) | Median year cohort | Prospective? | Singleton/Twins | Obstetric and perinatal variables | Postnatal variables and outcomes                  | NOS Selection | NOS Comparability | NOS Outcome | NOS Total |
|----------------------|------|---------|---------|----------------------|-------------------------|--------------------|--------------|-----------------|-----------------------------------|---------------------------------------------------|---------------|-------------------|-------------|-----------|
| Zozaya <sup>41</sup> | 2019 | Spain   | 21768   | 1,10                 | 28.6                    | 2010               | No           | Both            | ACS, C-section, SGA(-2SD)         | BPD36, LOS, Mortality, NEC>1, PDA, ROP (all), PVL | 4             | 1                 | 3           | 8         |

ACS: antenatal corticosteroids; Adol: adolescent; Ant: antenatal; BPD28: BPD defined as oxygen requirement on postnatal day 28; BPD36: defined as oxygen requirement at the postmenstrual age of 36 weeks; BW: birth weight; Chorio: chorioamnionitis; EOS: early onset sepsis; Gest: gestational; HDP: hypertensive disorders of pregnancy; Hemo: hemorrhage; Infect: infection; IUGR: intrauterine growth restriction; IVH: intraventricular hemorrhage; LIP: local intestinal perforation; LOS: late onset sepsis; Mat: maternal; Mec Ventil: mechanical ventilation; NEC: necrotizing enterocolitis; NOS: Newcastle Ottawa Scale; P3: 3<sup>rd</sup> percentile; P10: 10<sup>th</sup> percentile; PDA: patent ductus arteriosus; PremROM: premature rupture of membranes; ProlROM: prolonged rupture of membranes; Pulm hem: pulmonary hemorrhage; PVL: periventricular leukomalacia; RDS: respiratory distress syndrome; Resuscit: resuscitation at birth; ROP: retinopathy of prematurity; SD: standard deviation; SGA: small for gestational age; Single: singleton; Spont: spontaneous; sROP: severe ROP; Surfact: surfactant; UOS: undefined onset sepsis.

**Supplementary Table 3. Subgroup analyses based on continent**

| Meta-analysis | Criteria for subgrouping | K  | RR    | 95% CI      |             | P      | Heterogeneity      |        | Meta-regression |                       |
|---------------|--------------------------|----|-------|-------------|-------------|--------|--------------------|--------|-----------------|-----------------------|
|               |                          |    |       | Lower limit | Upper limit |        | I <sup>2</sup> (%) | P      | P-value         | R <sup>2</sup> analog |
| BPD36         | America                  | 11 | 1.183 | 1.143       | 1.224       | <0.001 | 45.7               | 0.048  | 0.145           | 0.0                   |
|               | Asia                     | 4  | 1.305 | 1.159       | 1.469       | <0.001 | 82.7               | 0.001  |                 |                       |
|               | Europe                   | 8  | 1.346 | 1.203       | 1.506       | <0.001 | 25.4               | 0.226  |                 |                       |
|               | Oceania                  | 2  | 1.066 | 0.950       | 1.197       | 0.274  | 0.0                | 0.486  |                 |                       |
| Any IVH       | America                  | 6  | 1.173 | 1.142       | 1.205       | <0.001 | 0.0                | 0.701  | 0.516           | 0.0                   |
|               | Asia                     | 2  | 1.150 | 1.069       | 1.237       | <0.001 | 6.1                | 0.302  |                 |                       |
|               | Europe                   | 4  | 1.081 | 0.898       | 1.301       | 0.410  | 0.0                | 0.395  |                 |                       |
| Severe IVH    | America                  | 10 | 1.248 | 1.169       | 1.333       | <0.001 | 60.5               | 0.007  | 0.747           | 0.0                   |
|               | Asia                     | 2  | 1.342 | 1.212       | 1.485       | <0.001 | 0.0                | 0.469  |                 |                       |
|               | Europe                   | 4  | 1.391 | 1.105       | 1.752       | 0.005  | 0.0                | 0.427  |                 |                       |
|               | Oceania                  | 3  | 1.105 | 0.621       | 1.965       | 0.735  | 40.9               | 0.184  |                 |                       |
| PVL           | America                  | 6  | 0.939 | 0.796       | 1.108       | 0.456  | 48.1               | 0.086  | 0.048           | 0.5                   |
|               | Asia                     | 5  | 1.208 | 1.032       | 1.414       | 0.018  | 58.4               | 0.047  |                 |                       |
|               | Europe                   | 2  | 1.303 | 0.980       | 1.731       | 0.068  | 16.8               | 0.273  |                 |                       |
| Severe ROP    | America                  | 8  | 1.121 | 1.038       | 1.212       | 0.004  | 68.4               | 0.002  | 0.827           | 0.0                   |
|               | Asia                     | 5  | 1.229 | 0.936       | 1.612       | 0.137  | 93.5               | <0.001 |                 |                       |
|               | Europe                   | 5  | 1.096 | 0.908       | 1.324       | 0.338  | 15.2               | 0.318  |                 |                       |
|               | Oceania                  | 2  | 1.252 | 0.993       | 1.580       | 0.058  | 0.0                | 0.350  |                 |                       |
| Any NEC       | America                  | 4  | 1.127 | 0.994       | 1.279       | 0.062  | 77.1               | 0.004  | 0.256           | 0.17                  |
|               | Asia                     | 2  | 1.289 | 0.974       | 1.706       | 0.076  | 70.3               | 0.066  |                 |                       |
|               | Europe                   | 4  | 0.933 | 0.653       | 1.332       | 0.703  | 0.0                | 0.0    |                 |                       |
|               | Oceania                  | 1  | 1.003 | 0.768       | 1.312       | 0.980  | 0.0                | 1.000  |                 |                       |
| Mortality     | America                  | 11 | 1.242 | 1.152       | 1.338       | <0.001 | 90.8               | <0.001 | 0.947           | 0.0                   |
|               | Asia                     | 4  | 1.200 | 1.087       | 1.325       | <0.001 | 50.9               | 0.106  |                 |                       |
|               | Europe                   | 2  | 1.228 | 1.152       | 1.308       | <0.001 | 0.0                | 0.443  |                 |                       |
|               | Oceania                  | 3  | 1.238 | 1.069       | 1.434       | 0.004  | 0.0                | 0.679  |                 |                       |

BPD36: bronchopulmonary dysplasia defined as oxygen requirement at the postmenstrual age of 36 weeks; GA: gestational age; IVH: intraventricular hemorrhage; K: number of studies; NEC: necrotizing enterocolitis; PVL: periventricular leukomalacia; ROP: retinopathy of prematurity.

**Supplementary Table 4. Meta-regression analysis (continuous covariates)**

| Meta-analysis | Covariate             | K  | Coefficient | Standard Error | P      | R <sup>2</sup> analog |
|---------------|-----------------------|----|-------------|----------------|--------|-----------------------|
| BPD36         | GA cohort (weeks)     | 25 | 0.025       | 0.013          | 0.065  | 0.05                  |
|               | Median year of cohort | 26 | -0.005      | 0.003          | 0.076  | 0.01                  |
| Any IVH       | GA cohort (weeks)     | 11 | 0.033       | 0.019          | 0.079  | 0.0                   |
|               | Median year of cohort | 12 | -0.002      | 0.003          | 0.531  | 0.0                   |
| Severe IVH    | GA cohort (weeks)     | 18 | -0.014      | 0.024          | 0.567  | 0.0                   |
|               | Median year of cohort | 19 | 0.002       | 0.005          | 0.725  | 0.0                   |
| PVL           | GA cohort (weeks)     | 11 | 0.038       | 0.063          | 0.546  | 0.0                   |
|               | Median year of cohort | 13 | 0.009       | 0.010          | 0.380  | 0.0                   |
| Severe ROP    | GA cohort (weeks)     | 19 | 0.005       | 0.017          | 0.761  | 0.0                   |
|               | Median year of cohort | 20 | 0.001       | 0.007          | 0.901  | 0.0                   |
| Any NEC       | GA cohort (weeks)     | 10 | -0.012      | 0.023          | 0.594  | 0.0                   |
|               | Median year of cohort | 11 | 0.029       | 0.015          | 0.052  | 0.33                  |
| Mortality     | GA cohort (weeks)     | 18 | 0.051       | 0.014          | <0.001 | 0.75                  |
|               | Median year of cohort | 20 | -0.009      | 0.004          | 0.019  | 0.37                  |

Random effects (method of moments), univariate meta-regression. Coefficient indicates the change in the log of the RR of the association between male sex and the corresponding outcome for a unit change in the predictor covariate. R<sup>2</sup> analog: total between-study variance explained by the moderator. BPD36: bronchopulmonary dysplasia defined as oxygen requirement at the postmenstrual age of 36 weeks; GA: gestational age; IVH: intraventricular hemorrhage; K: number of studies; NEC: necrotizing enterocolitis; ROP: retinopathy of prematurity.

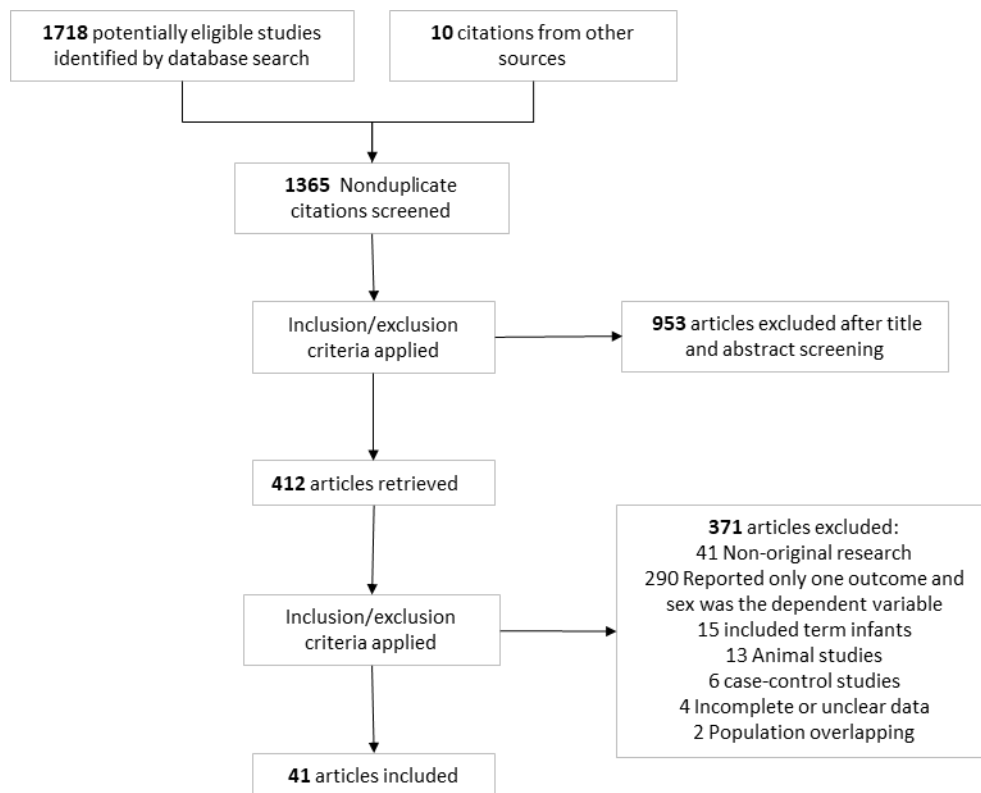

**Supplementary Figure 1.** Flow diagram of the systematic search.



### Any BPD

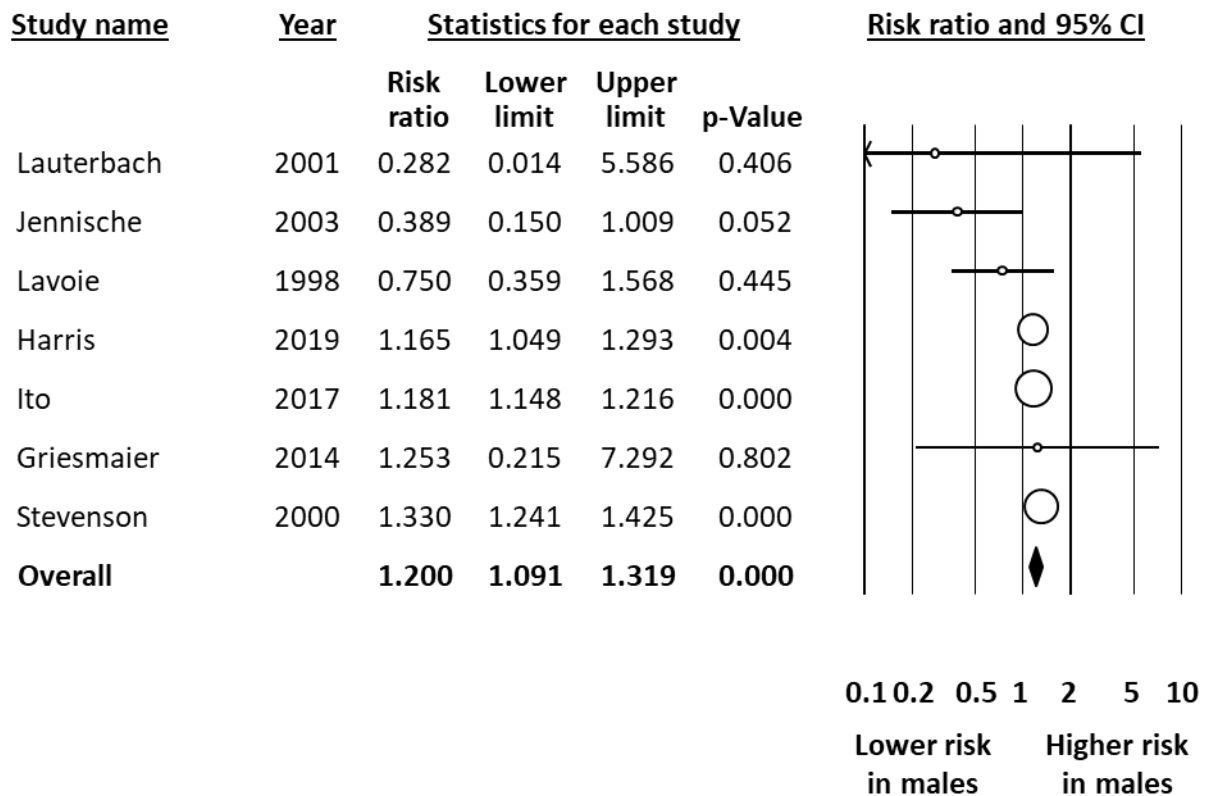

**Supplementary Figure 2.** Meta-analysis of the association between male sex of preterm infants and risk of bronchopulmonary dysplasia (BPD), defined as oxygen requirement on postnatal day 28.

CI: confidence interval.

### Moderate/severe BPD

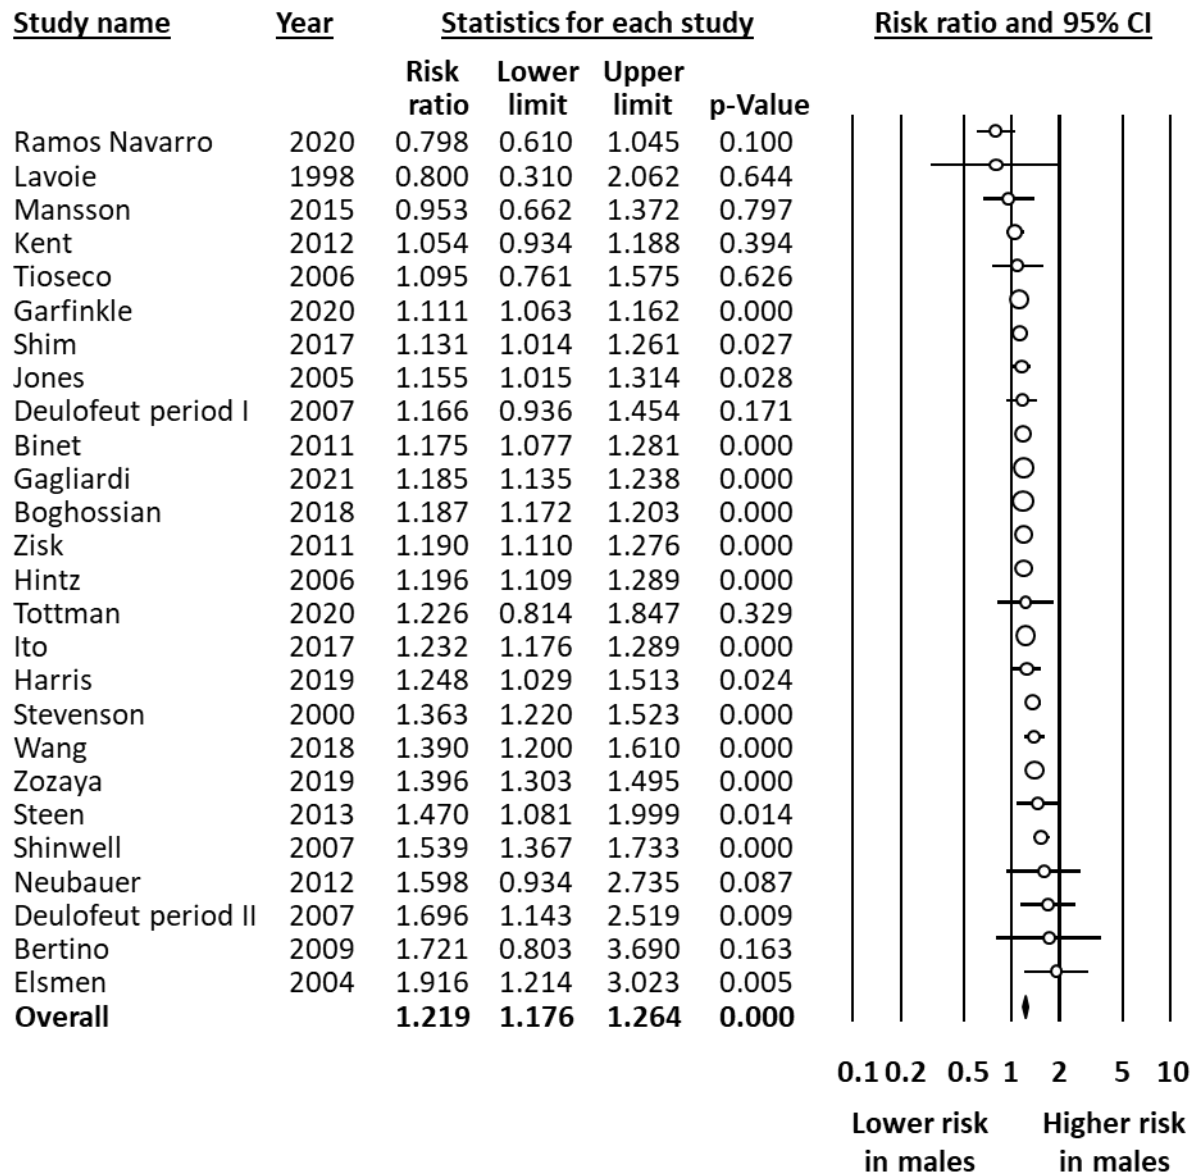

**Supplementary Figure 3.** Meta-analysis of the association between male sex of preterm infants and risk of bronchopulmonary dysplasia (BPD), defined as oxygen requirement at the postmenstrual age of 36 weeks.

CI: confidence interval.

### Any IVH

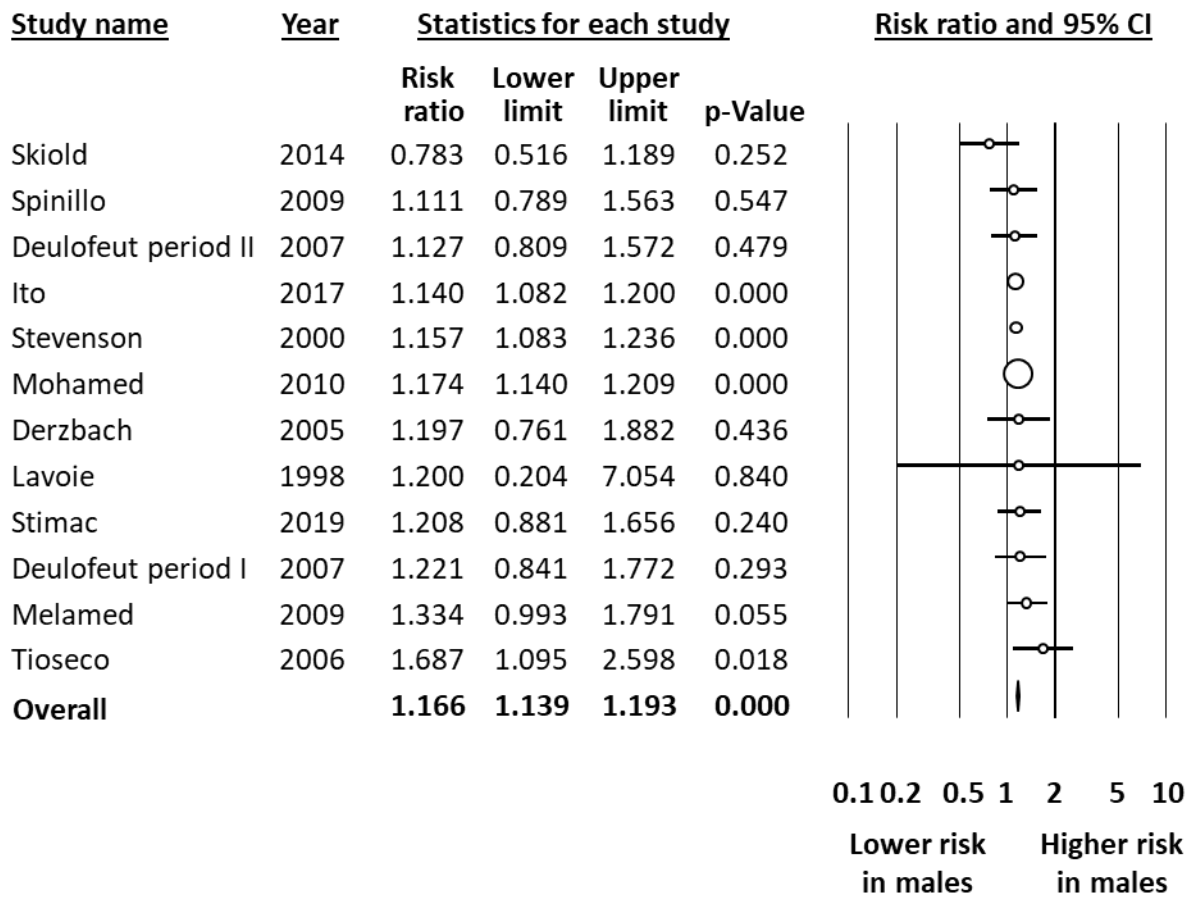

**Supplementary Figure 4.** Meta-analysis of the association between male sex and risk of intraventricular hemorrhage (IVH, grade 1-4 ) in preterm infants.

CI: confidence interval.

## Severe IVH

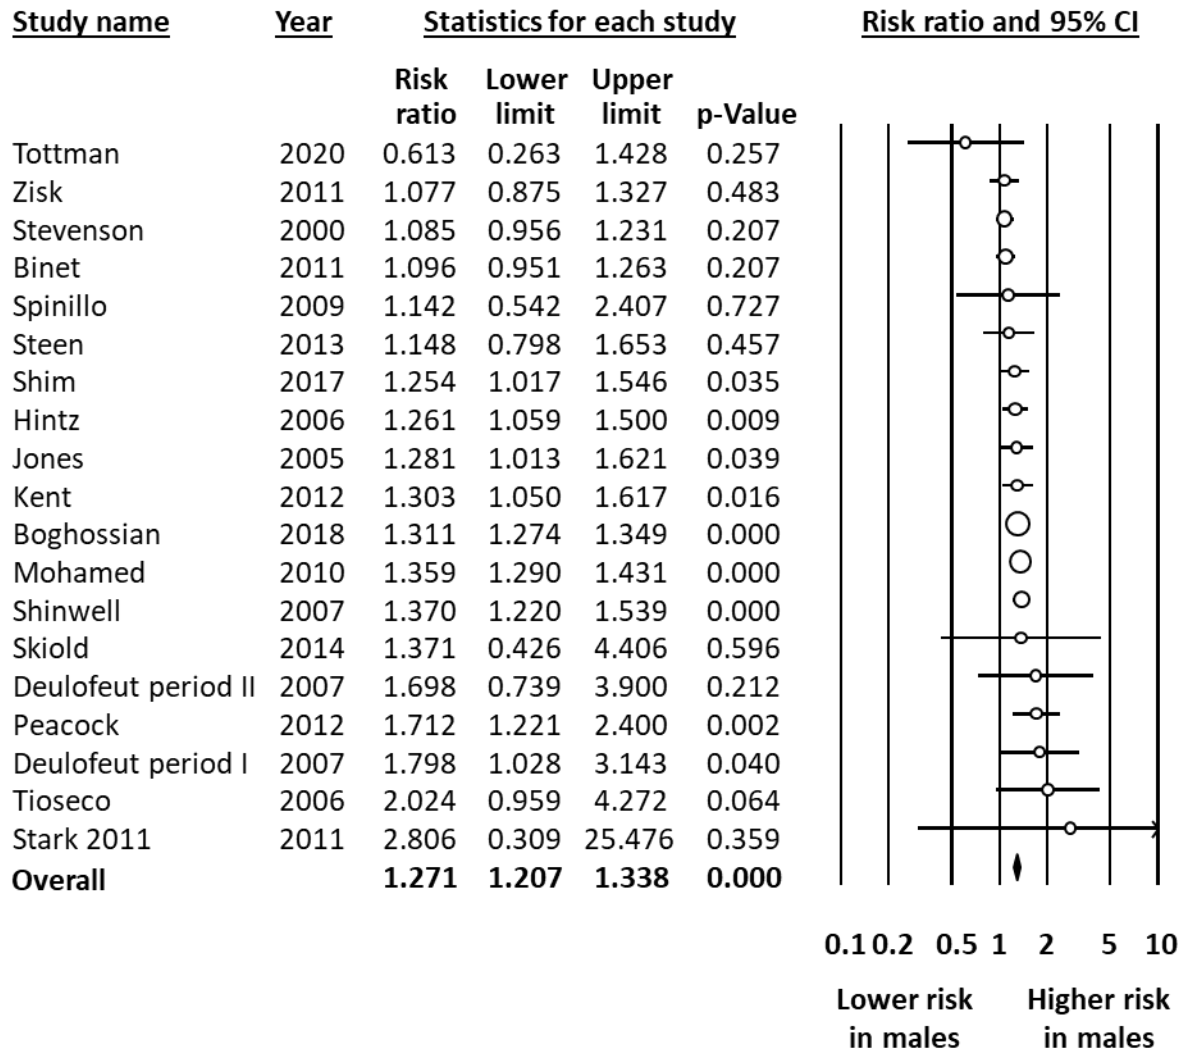

**Supplementary Figure 5.** Meta-analysis of the association between male sex and risk of severe intraventricular hemorrhage (IVH grade 3-4) in preterm infants.

CI: confidence interval.

## PVL

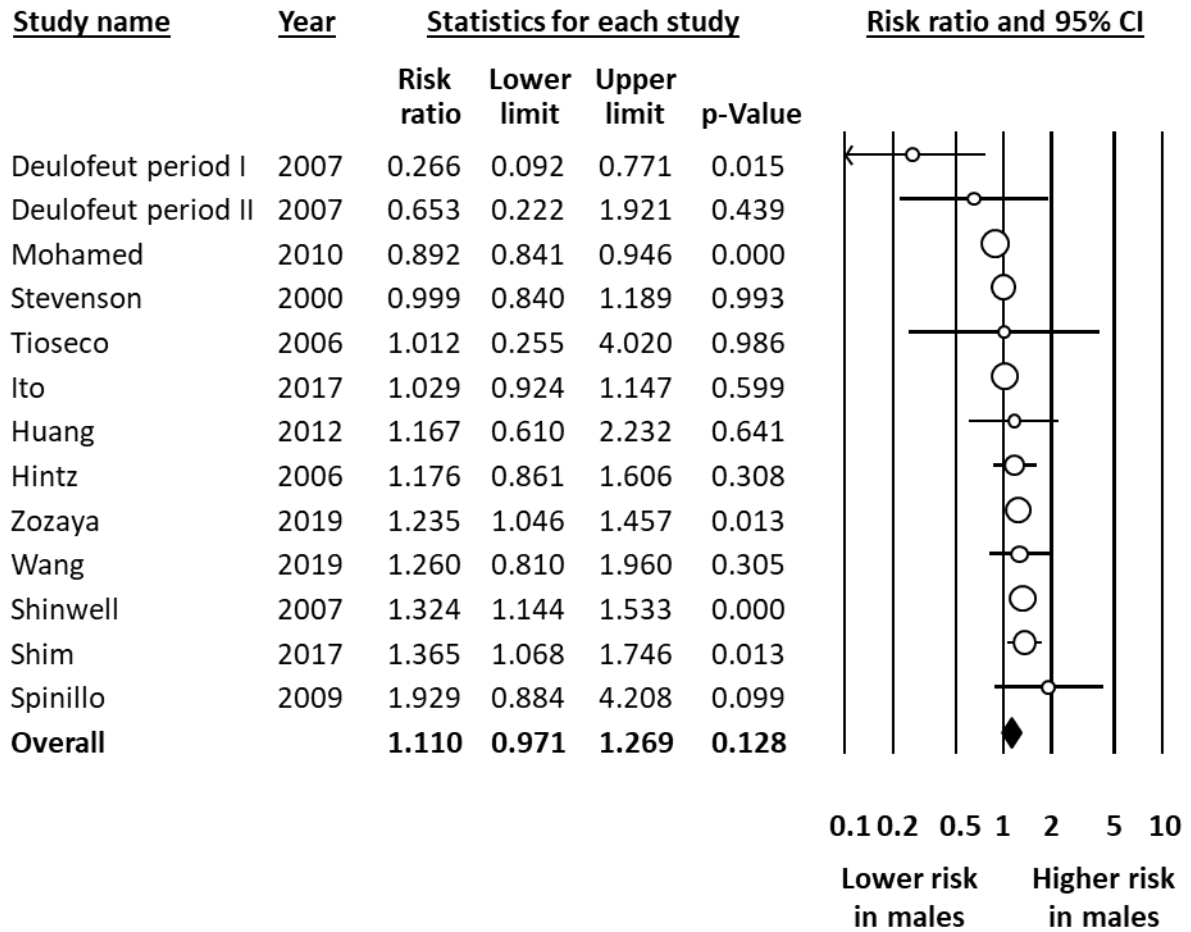

**Supplementary Figure 6.** Meta-analysis of the association between male sex and risk of periventricular leukomalacia (PVL) in preterm infants.

CI: confidence interval.

### Severe IVH/PVL

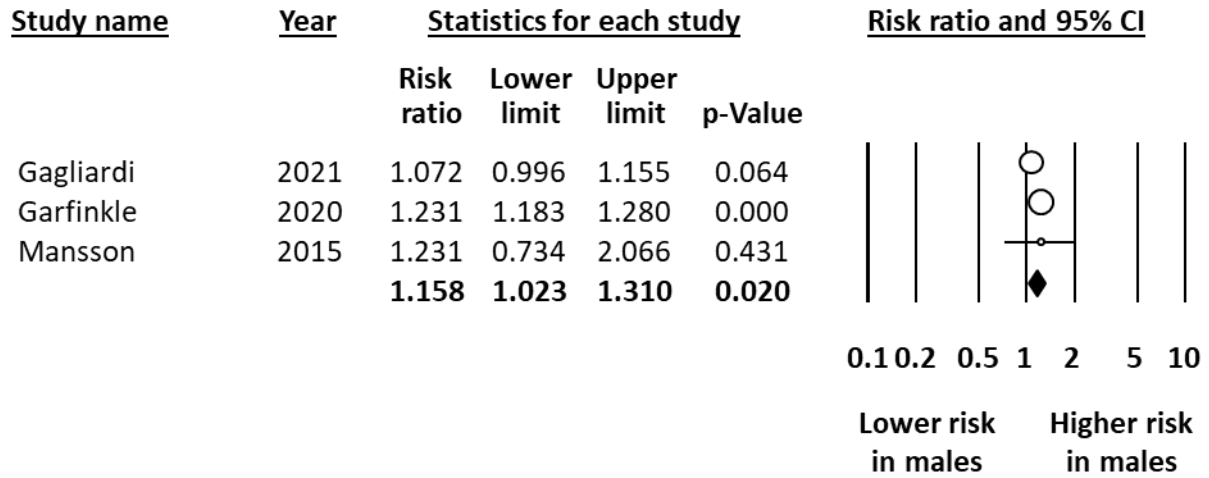

**Supplementary Figure 7.** Meta-analysis of the association between male sex of preterm infants and risk of severe intraventricular hemorrhage (IVH grade 3-4) or periventricular leukomalacia (PVL).

CI: confidence interval.

### Any ROP

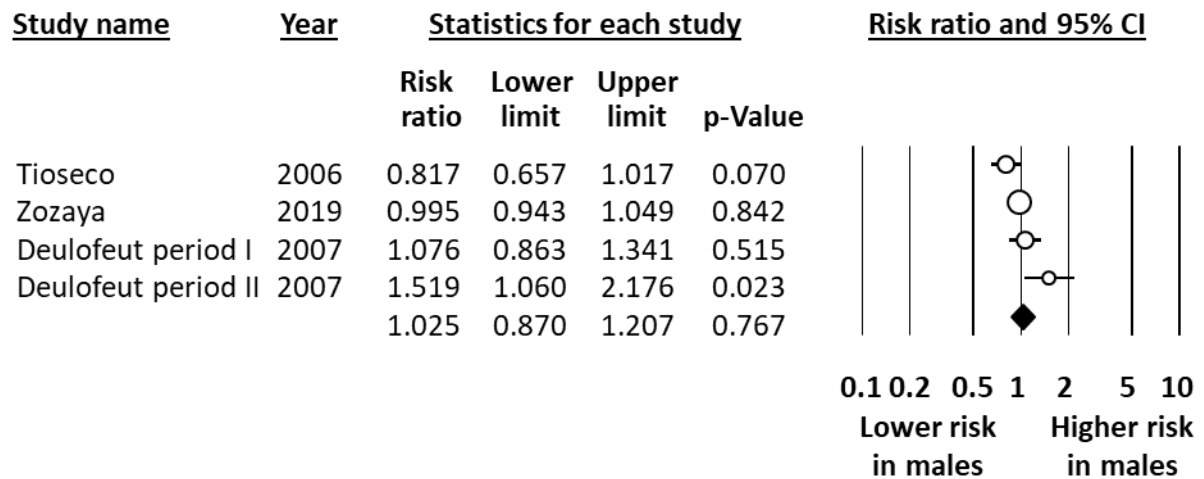

**Supplementary Figure 8.** Meta-analysis of the association between male sex of preterm infants and risk of retinopathy of prematurity (ROP, any stage).

CI: confidence interval.

### Severe ROP

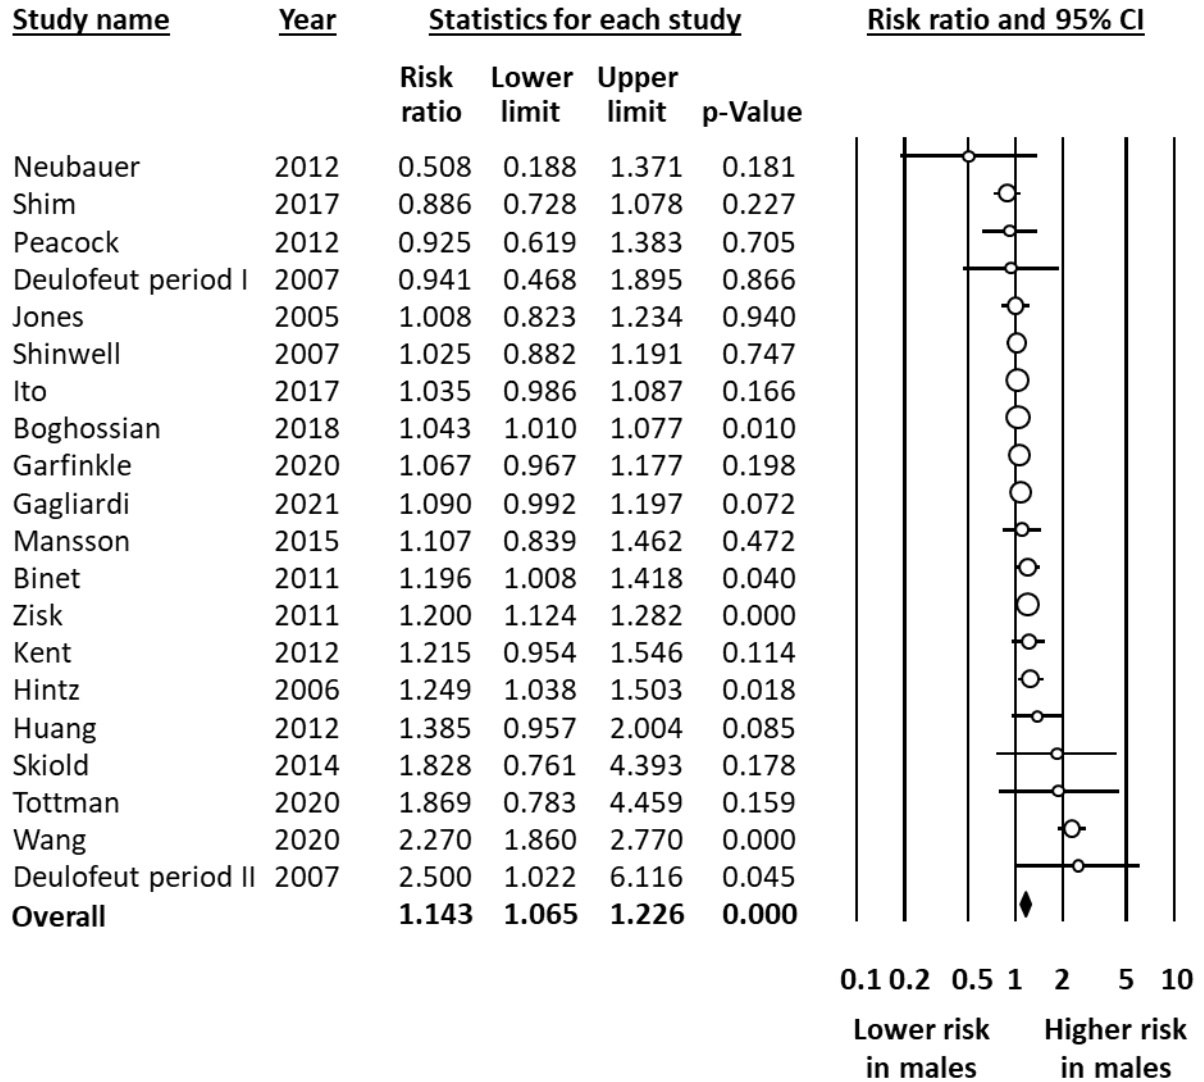

**Supplementary Figure 9.** Meta-analysis of the association between male sex in preterm infants and risk of severe retinopathy of prematurity (ROP grade $\geq$ 3 or requiring treatment).

CI: confidence interval.

### Any NEC

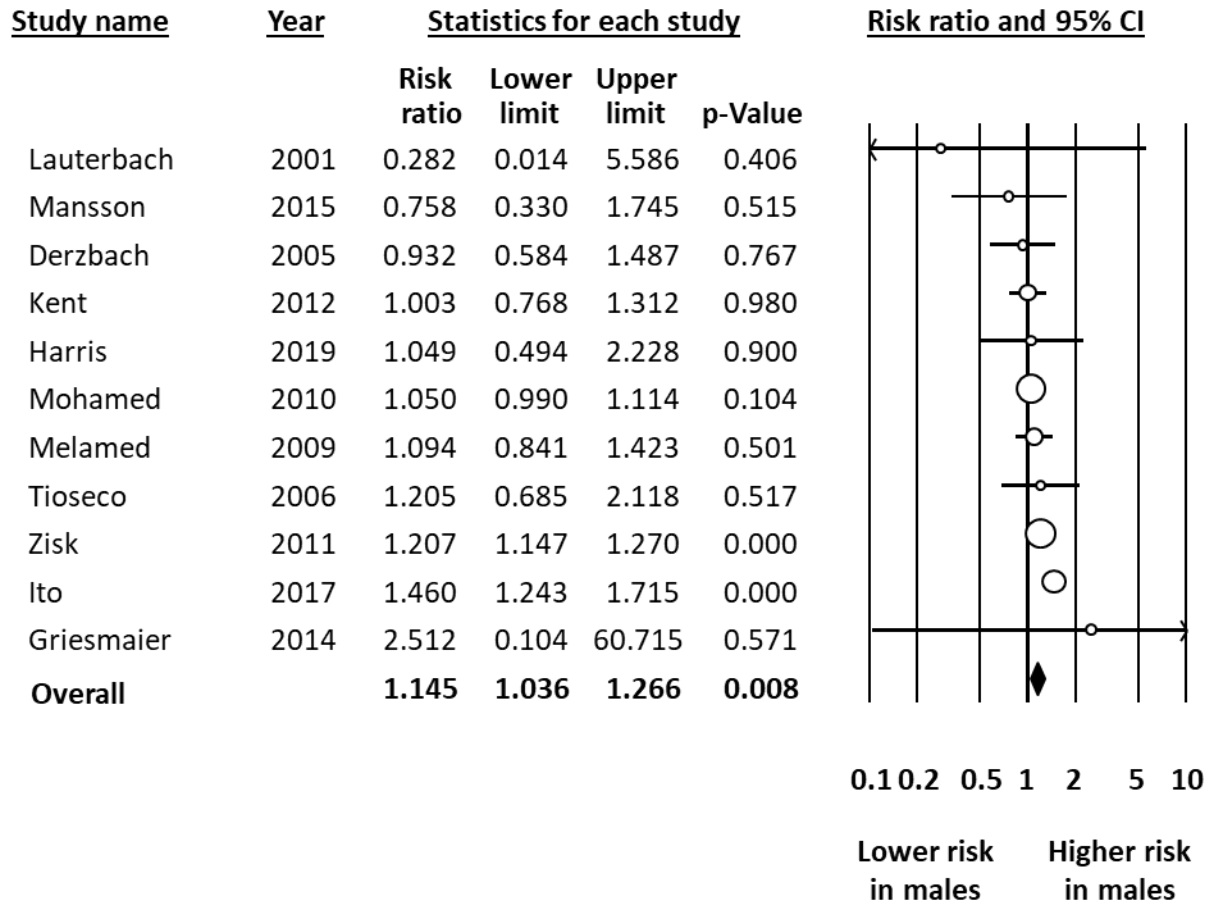

**Supplementary Figure 10.** Meta-analysis of the association between male sex and risk of necrotizing enterocolitis (NEC, any stage) in preterm infants.

CI: confidence interval.



### NEC stage ≥ II

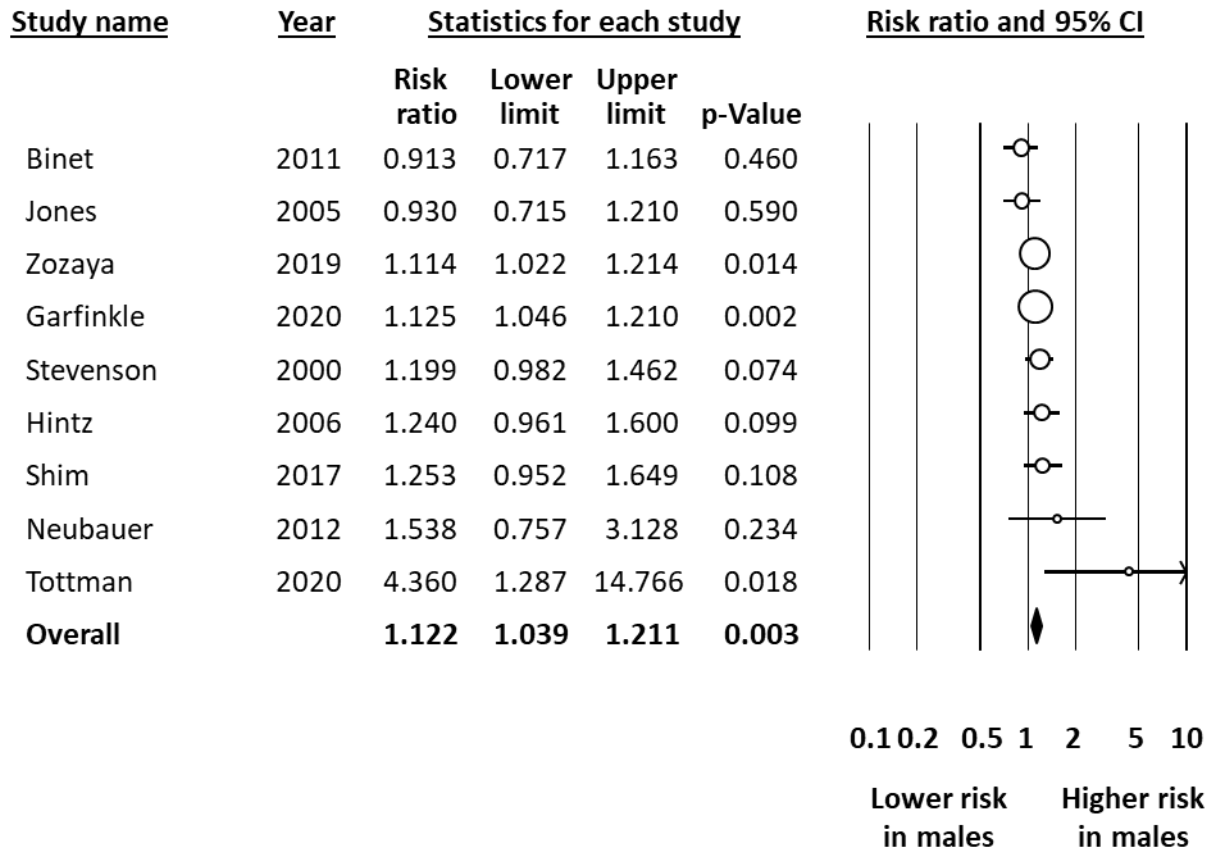

**Supplementary Figure 11.** Meta-analysis of the association between male sex and risk of necrotizing enterocolitis (NEC, stage ≥ II) in preterm infants.

CI: confidence interval.

## Mortality

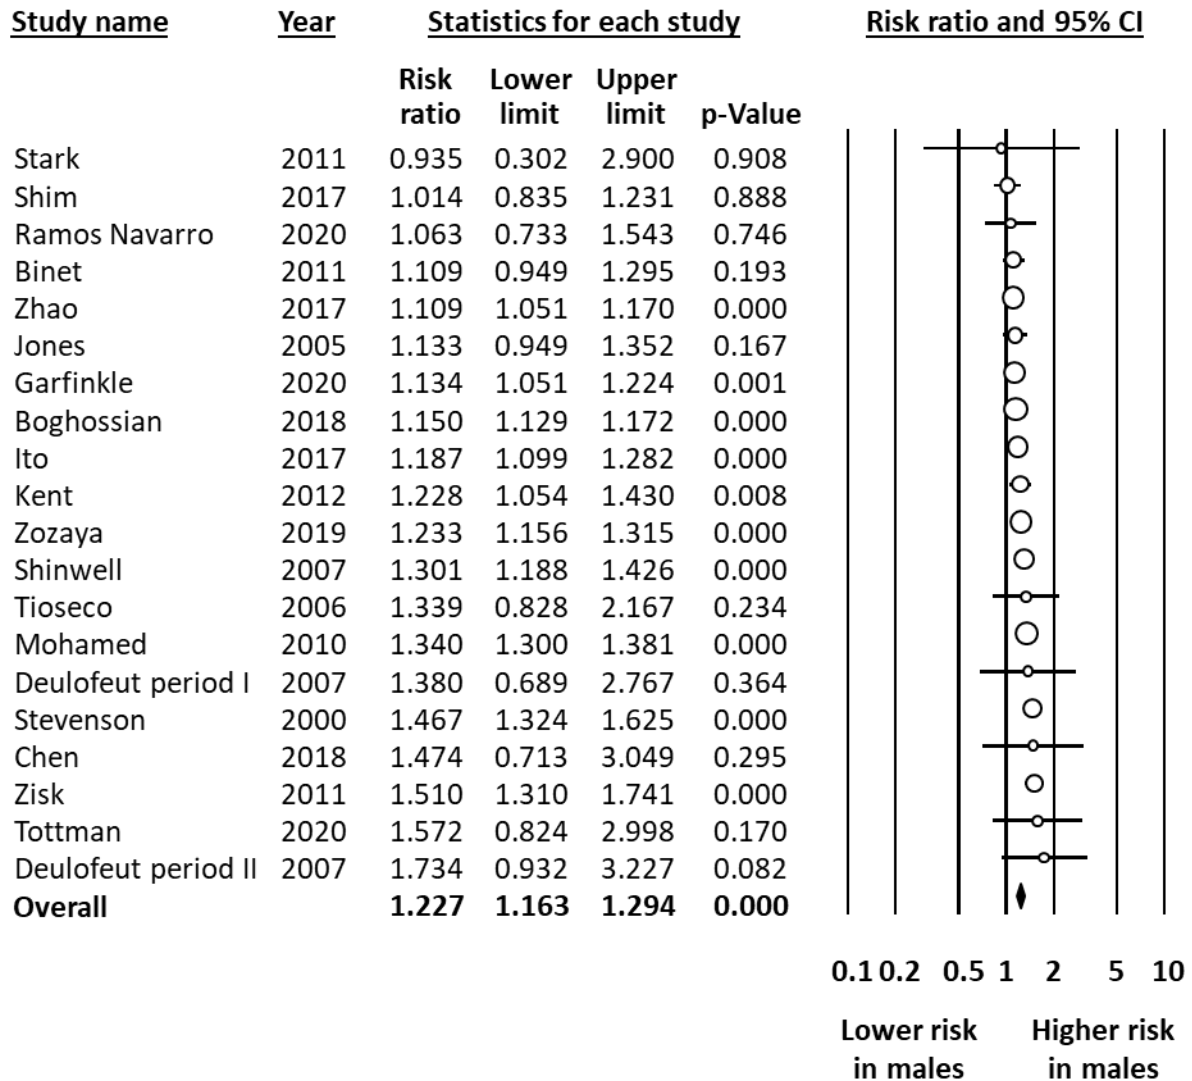

**Supplementary Figure 12.** Meta-analysis of the association between male sex and risk of mortality before discharge in preterm infants.

CI: confidence interval.

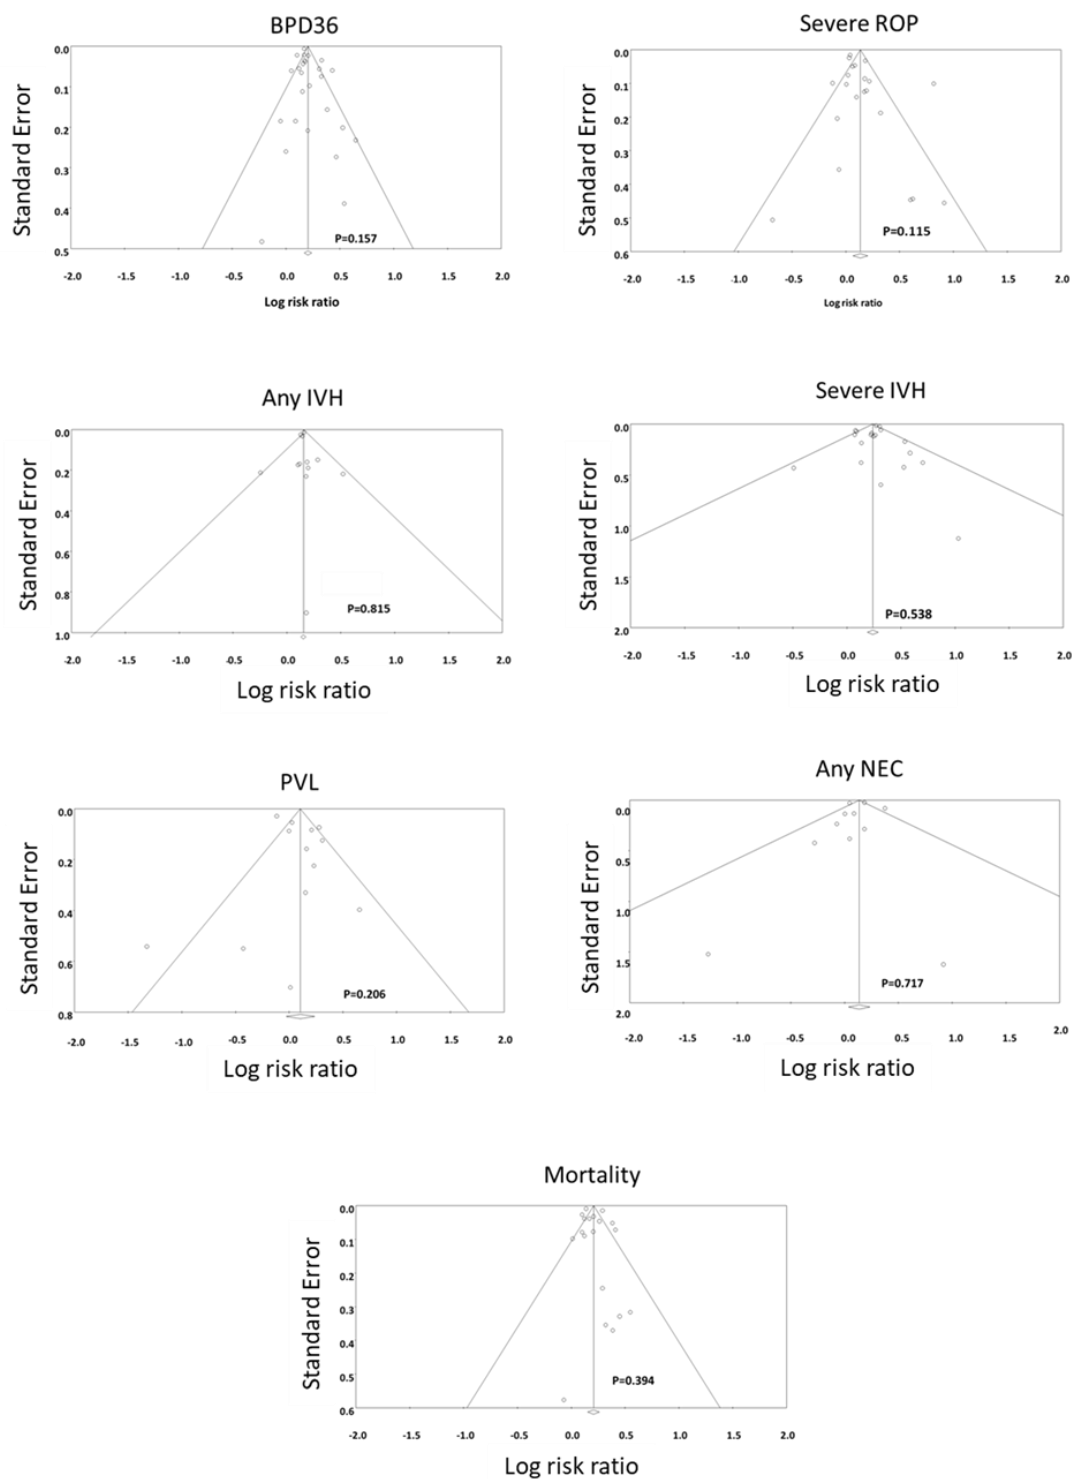

**Supplementary Figure 13.** Funnel plot for publication bias analysis for the studies included in the different meta-analyses.

BPD36: bronchopulmonary dysplasia defined as oxygen requirement at the postmenstrual age of 36 weeks; ROP: retinopathy of prematurity; IVH: intraventricular hemorrhage; PVL: periventricular leukomalacia; NEC: necrotizing enterocolitis. P-value represents Egger's regression test for funnel plot asymmetry.

## List of included studies

1. Bertino E, Coscia A, Boni L, et al. Weight growth velocity of very low birth weight infants: role of gender, gestational age and major morbidities. *Early human development*. 2009;85(6):339-347.
2. Binet M-E, Bujold E, Lefebvre F, Tremblay Y, Piedboeuf B, Network CN. Role of gender in morbidity and mortality of extremely premature neonates. *American journal of perinatology*. 2012;29(03):159-166.
3. Boghossian NS, Geraci M, Edwards EM, Horbar JD. Sex differences in mortality and morbidity of infants born at less than 30 weeks' gestation. *Pediatrics*. 2018;142(6).
4. Chen C, Tian T, Liu L, Zhang J, Fu H. Gender-related efficacy of pulmonary surfactant in infants with respiratory distress syndrome: A STROBE compliant study. *Medicine*. 2018;97(17).
5. Derzbach L, Treszl A, Balogh Á, Vásárhelyi B, Tulassay T. Gender dependent association between perinatal morbidity and estrogen receptor-alpha PvuII polymorphism. *Journal of perinatal medicine*. 2005;33(5):461-462.
6. Deulofeut R, Dudell G, Sola A. Treatment-by-gender effect when aiming to avoid hyperoxia in preterm infants in the NICU. *Acta Paediatrica*. 2007;96(7):990-994.
7. Elsmén E, Pupp IH, Hellström-Westas L. Preterm male infants need more initial respiratory and circulatory support than female infants. *Acta Paediatrica*. 2004;93(4):529-533.
8. Gagliardi L, Rusconi F, Reichman B, et al. Neonatal outcomes of extremely preterm twins by sex pairing: an international cohort study. *Archives of Disease in Childhood-Fetal and Neonatal Edition*. 2021;106(1):17-24.
9. Garfinkle J, Yoon EW, Alvaro R, et al. Trends in sex-specific differences in outcomes in extreme preterms: progress or natural barriers? *Archives of Disease in Childhood-Fetal and Neonatal Edition*. 2020;105(2):158-163.
10. Griesmaier E, Santuari E, Edlinger M, Neubauer V, Waltner-Romen M, Kiechl-Kohlendorfer U. Differences in the maturation of amplitude-integrated EEG signals in male and female preterm infants. *Neonatology*. 2014;105(3):175-181.
11. Harris C, Zivanovic S, Lunt A, et al. Lung function and respiratory outcomes in teenage boys and girls born very prematurely. *Pediatric pulmonology*. 2020;55(3):682-689.
12. Hintz SR, Kendrick DE, Vohr BR, Poole WK, Higgins RD, Network NNR. Gender differences in neurodevelopmental outcomes among extremely preterm, extremely-low-birthweight infants. *Acta paediatrica*. 2006;95(10):1239-1248.
13. Huang H-M, Lin S-A, Chang Y-C, Kuo H-K. Correlation between periventricular leukomalacia and retinopathy of prematurity. *European journal of ophthalmology*. 2012;22(6):980-984.
14. Ito M, Tamura M, Namba F, Japan NRNo. Role of sex in morbidity and mortality of very premature neonates. *Pediatrics International*. 2017;59(8):898-905.
15. Jennische M, Sedin G. Gender differences in outcome after neonatal intensive care: speech and language skills are less influenced in boys than in girls at 6.5 years. *Acta Paediatrica*. 2003;92(3):364-378.
16. Jones HP, Karuri S, Cronin CM, et al. Actuarial survival of a large Canadian cohort of preterm infants. *BMC pediatrics*. 2005;5(1):1-13.
17. Kent AL, Wright IM, Abdel-Latif ME. Mortality and adverse neurologic outcomes are greater in preterm male infants. *Pediatrics*. 2012;129(1):124-131.
18. Lauterbach MD, Raz S, Sander CJ. Neonatal hypoxic risk in preterm birth infants: the influence of sex and severity of respiratory distress on cognitive recovery. *Neuropsychology*. 2001;15(3):411.
19. Lavoie ME, Robaey P, Stauder JE, Glorieux J, Lefebvre F. Extreme prematurity in healthy 5-year-old children: A re-analysis of sex effects on event-related brain activity. *Psychophysiology*. 1998;35(6):679-689.

20. Månsson J, Fellman V, Stjernqvist K, Group ES. Extremely preterm birth affects boys more and socio-economic and neonatal variables pose sex-specific risks. *Acta paediatrica*. 2015;104(5):514-521.
21. Melamed N, Yogev Y, Glezerman M. Effect of fetal sex on pregnancy outcome in twin pregnancies. *Obstetrics & Gynecology*. 2009;114(5):1085-1092.
22. Mohamed MA, Aly H. Male gender is associated with intraventricular hemorrhage. *Pediatrics*. 2010;125(2):e333-e339.
23. Neubauer V, Griesmaier E, Ralser E, Kiechl-Kohlendorfer U. The effect of sex on outcome of preterm infants—a population-based survey. *Acta paediatrica*. 2012;101(9):906-911.
24. Peacock JL, Marston L, Marlow N, Calvert SA, Greenough A. Neonatal and infant outcome in boys and girls born very prematurely. *Pediatric research*. 2012;71(3):305-310.
25. Ramos-Navarro C, Sánchez-Luna M, Zeballos-Sarrato S, Pescador-Chamorro I. Antenatal corticosteroids and the influence of sex on morbidity and mortality of preterm infants. *The Journal of Maternal-Fetal & Neonatal Medicine*. 2020:1-8.
26. Shim S-Y, Cho SJ, Kong KA, Park EA. Gestational age-specific sex difference in mortality and morbidities of preterm infants: a nationwide study. *Scientific reports*. 2017;7(1):1-8.
27. Shinwell ES, Reichman B, Lerner-Geva L, Boyko V, Blickstein I. “Masculinizing” effect on respiratory morbidity in girls from unlike-sex preterm twins: a possible transchorionic paracrine effect. *Pediatrics*. 2007;120(3):e447-e453.
28. Skiöld B, Alexandrou G, Padilla N, Blennow M, Vollmer B, Ådén U. Sex differences in outcome and associations with neonatal brain morphology in extremely preterm children. *The Journal of pediatrics*. 2014;164(5):1012-1018.
29. Spinillo A, Montanari L, Gardella B, Roccio M, Stronati M, Fazzi E. Infant sex, obstetric risk factors, and 2-year neurodevelopmental outcome among preterm infants. *Developmental Medicine & Child Neurology*. 2009;51(7):518-525.
30. Stark MJ, Wright IM, Clifton VL. Sex-specific alterations in placental 11 $\beta$ -hydroxysteroid dehydrogenase 2 activity and early postnatal clinical course following antenatal betamethasone. *American Journal of Physiology-Regulatory, Integrative and Comparative Physiology*. 2009;297(2):R510-R514.
31. Stark MJ, Hodyl NA, Wright IM, Clifton V. The influence of sex and antenatal betamethasone exposure on vasoconstrictors and the preterm microvasculature. *The Journal of Maternal-Fetal & Neonatal Medicine*. 2011;24(10):1215-1220.
32. Steen EE, Källén K, Maršál K, Norman M, Hellström-Westas L. Impact of sex on perinatal mortality and morbidity in twins. *Journal of perinatal medicine*. 2014;42(2):225-231.
33. Stevenson DK, Verter J, Fanaroff AA, et al. Sex differences in outcomes of very low birthweight infants: the newborn male disadvantage. *Archives of disease in childhood-fetal and neonatal edition*. 2000;83(3):F182-F185.
34. Štimac T, Šopić-Rahelić A-M, Ivandić J, Ekinja E, Blickstein I. Effect of gender on growth-restricted fetuses born preterm. *Journal of perinatal medicine*. 2019;47(6):677-679.
35. Tioseco JA, Aly H, Essers J, Patel K, El-Mohandes AA. Male sex and intraventricular hemorrhage. *Pediatric Critical Care Medicine*. 2006;7(1):40-44.
36. Tottman AC, Bloomfield FH, Cormack BE, Harding JE, Taylor J, Alsweiler JM. Sex-specific relationships between early nutrition and neurodevelopment in preterm infants. *Pediatric research*. 2020;87(5):872-878.
37. Walker M, Fitzgerald B, Keating S, Ray J, Windrim R, Kingdom J. Sex-specific basis of severe placental dysfunction leading to extreme preterm delivery. *Placenta*. 2012;33(7):568-571.
38. Wang L-W, Lin Y-C, Wang S-T, Huang C-C, Group TPIDCS. Identifying risk factors shared by bronchopulmonary dysplasia, severe retinopathy, and cystic periventricular leukomalacia in very preterm infants for targeted intervention. *Neonatology*. 2018;114(1):17-24.
39. Zhao D, Zou L, Lei X, Zhang Y. Gender differences in infant mortality and neonatal morbidity in mixed-gender twins. *Scientific reports*. 2017;7(1):1-6.

40. Zisk JL, Genen LH, Kirkby S, Webb D, Greenspan J, Dysart K. Do premature female infants really do better than their male counterparts? *American journal of perinatology*. 2011;28(03):241-246.
41. Zozaya C, Avila-Alvarez A, Arruza L, et al. The effect of morbidity and sex on postnatal growth of very preterm infants: a multicenter cohort study. *Neonatology*. 2019;115(4):348-354.
